# Supplementary material for: Rapid detection of enterobacteria in wastewater treated by microalgal consortia using loop-mediated isothermal amplification (LAMP)
Source: PeerJ. 2024 Nov 15;12:e18305. doi: 10.7717/peerj.18305 (PMC11572355; doi:10.7717/peerj.18305)
Supplement: Supplemental Information 10 [file peerj-12-18305-s010.xlsx]

## Sheet: Sheet1
	GenBank code		Genus		Identity (%)	Query coverage	E-value
	KY817316.1		Acinetobacter baylyi		95.79	100	0
	MH185836.1		Acinetobacter sp.		97.44	99	0
	OR889414.1		Enterobacter hormaechi		100	100	0
	MN208123.1		Enterobacter cloacae		98.03	99	0
	OR133169.1		Escherichia coli (15922)		100	100	0
	CP127316.1		Escherichia coli (51446)		100	100	0
	OQ550178.1		Klebsiella pneumoniae		96.51	95	0
	OR121927.1		Morganella morganii		100	100	0
	MH001385.1		Serratia liquefaciens		91.6	92	0
