# Supplementary material for: Rapid detection of enterobacteria in wastewater treated by microalgal consortia using loop-mediated isothermal amplification (LAMP)
Source: PeerJ. 2024 Nov 15;12:e18305. doi: 10.7717/peerj.18305 (PMC11572355; doi:10.7717/peerj.18305)
Supplement: Supplemental Information 11 [file peerj-12-18305-s011.xlsx]

## Sheet: Sheet1
			Bacterial strains
					mcr-1	KPC	OXA-23	VIM
			Acinetobacter baylyi		+	-	+	+
			Acinetobacter sp.		-	+	-	+
			Enterobacter hormaechi		-	-	+	+
			Enterobacter cloacae		-	-	+	-
			Escherichia coli (15922)		-	+	+	-
			Escherichia coli (51446)		-	-	+	-
			Klebsiella pneumoniae		+	-	-	-
			Morganella morganii		+	+	+	-
			Serratia liquefaciens		+	-	+	-
