# Supplementary material for: Rapid detection of enterobacteria in wastewater treated by microalgal consortia using loop-mediated isothermal amplification (LAMP)
Source: PeerJ. 2024 Nov 15;12:e18305. doi: 10.7717/peerj.18305 (PMC11572355; doi:10.7717/peerj.18305)
Supplement: Supplemental Information 12 [file peerj-12-18305-s012.xlsx]

## Sheet: Sheet1
			LAMP
	Time (hrs)	AMR	Time (min)
Bioremediation treatment time (hrs)			1	10	20	30	40	50	60
	0	mcr-1	0.001 ± 0.003	0.015 ± 0.008	0.021 ± 0.008	0.124 ± 0.069	0.196 ± 0.005	0.212 ± 0.013	0.212 ± 0.013
		KPC	0.001 ± 0.001	0.004 ± 0.002	0.014 ± 0.005	0.139 ± 0.020	0.181 ± 0.005	0.203 ± 0.008	0.217 ± 0.009
		OXA-23	0.001 ± 0.001	0.005 ± 0.001	0.008 ± 0.001	0.040 ± 0.035	0.165 ± 0.045	0.235 ± 0.044	0.262 ± 0.056
		VIM	0.001 ± 0.001	0.006 ± 0.001	0.008 ± 0.001	0.029 ± 0.001	0.171 ± 0.034	0.213 ± 0.056	0.257 ± 0.068
	24	mcr-1	0.004 ± 0.003	0.004 ± 0.003	0.008 ± 0.001	0.081 ± 0.066	0.155 ± 0.031	0.177 ± 0.033	0.187 ± 0.035
		KPC	0.001 ± 0.005	0.013 ± 0.003	0.019 ± 0.001	0.120 ± 0.015	0.170 ± 0.030	0.199 ± 0.005	0.212 ± 0.030
		OXA-23	0.001 ± 0.005	0.011 ± 0.003	0.015 ± 0.001	0.20 ± 0.006	0.253 ± 0.007	0.278 ± 0.005	0.293 ± 0.013
		VIM	0.001 ± 0.004	0.016 ± 0.005	0.021 ± 0.005	0.038 ± 0.023	0.127 ± 0.093	0.207 ± 0.014	0.246 ± 0.015
	48	mcr-1	0.012 ± 0.004	0.012 ± 0.004	0.010 ± 0.002	0.127 ± 0.028	0.160 ± 0.031	0.178 ± 0.036	0.189 ± 0.039
		KPC	0.001 ± 0.005	0.014 ± 0.003	0.018 ± 0.003	0.125 ± 0.004	0.161 ± 0.086	0.202 ± 0.109	0.222 ± 0.108
		OXA-23	0.001 ± 0.002	0.011 ± 0.002	0.016 ± 0.001	0.180 ± 0.036	0.242 ± 0.016	0.258 ± 0.026	0.269 ± 0.034
		VIM	0.001 ± 0.001	0.013 ± 0.003	0.017 ± 0.004	0.129 ± 0.047	0.212 ± 0.020	0.245 ± 0.013	0.267 ± 0.013
	72	mcr-1	0.015 ± 0.007	0.015 ± 0.007	0.013 ± 0.002	0.020 ± 0.002	0.115 ± 0.001	0.134 ± 0.007	0.142 ± 0.011
		KPC	0.001 ± 0.005	0.010 ± 0.007	0.015 ± 0.009	0.072 ± 0.039	0.162 ± 0.009	0.194 ± 0.018	0.212 ± 0.022
		OXA-23	0.001 ± 0.003	0.006 ± 0.003	0.009 ± 0.003	0.165 ± 0.009	0.225 ± 0.007	0.233 ± 0.006	0.233 ± 0.006
		VIM	0.001 ± 0.001	0.012 ± 0.007	0.016 ± 0.009	0.042 ± 0.021	0.139 ± 0.045	0.193 ± 0.015	0.219 ± 0.035
	Control	mcr-1	0.001 ± 0.002	0.014 ± 0.001	0.017 ± 0.001	0.019 ± 0.001	0.019 ± 0.024	0.019 ± 0.075	0.024 ± 0.075
		KPC	0.001 ± 0.005	0.017 ± 0.001	0.023 ± 0.002	0.026 ± 0.002	0.027 ± 0.002	0.075 ± 0.084	0.089 ± 0.108
		OXA-23	0.005 ± 0.002	0.010 ± 0.004	0.015 ± 0.003	0.017 ± 0.003	0.018 ± 0.002	0.018 ± 0.002	0.018 ± 0.002
		VIM	0.001 ± 0.001	0.014 ± 0.001	0.017 ± 0.001	0.019 ± 0.001	0.019 ± 0.001	0.019 ± 0.001	0.137 ± 0.007
	Marker antimicrobial resistance (AMR), loop-metiated isothermal amplification (LAMP).
